# Supplementary material for: Terminal restriction fragment length polymorphism is an “old school” reliable technique for swift microbial community screening in anaerobic digestion
Source: PubMed Central journal article supplement (PMC6235954; doi:10.1038/s41598-018-34921-7), 2018-11-14
Supplement: 41598_2018_34921_MOESM4_ESM.pdf [file 41598_2018_34921_MOESM4_ESM.pdf]

## Supplementary Information

Journal: Scientific Reports

Title: Terminal restriction fragment length polymorphism as an “old school” but reliable technique for swift microbial community screening in anaerobic digestion

**Jo De Vrieze<sup>1,\*</sup>, Umer Z. Ijaz<sup>2</sup>, Aaron M. Saunders<sup>3</sup>, Susanne Theuerl<sup>4</sup>**

<sup>1</sup> Center for Microbial Ecology and Technology (CMET), Ghent University, Coupure Links 653, B-9000 Gent, Belgium

<sup>2</sup> Infrastructure and Environment Research Division, School of Engineering, University of Glasgow, UK

<sup>3</sup> Department of Biotechnology, Chemistry and Environmental Engineering, Aalborg University, Sohngardsholmsvej 49, 9000 Aalborg, Denmark

<sup>4</sup> Leibniz Institute for Agricultural Engineering and Bioeconomy e.V. (ATB), Department Bioengineering, Max-Eyth-Allee 100, D-14469 Potsdam, Germany

\* Correspondence to: Jo De Vrieze, Ghent University; Faculty of Bioscience Engineering; Center for Microbial Ecology and Technology (CMET); Coupure Links 653; B-9000 Gent, Belgium; phone: +32 (0)9 264 59 76; fax: +32 (0)9 264 62 48; E-mail: Jo.DeVrieze@UGent.be; Webpage: [www.cmet.ugent.be](http://www.cmet.ugent.be).

# Contents

|                                                           |   |
|-----------------------------------------------------------|---|
| S1. Volatile fatty acid analysis .....                    | 3 |
| S2. Operational data .....                                | 1 |
| S3. Rarefaction curves.....                               | 1 |
| S4. Microbial community diversity.....                    | 2 |
| S5. Microbial community organisation .....                | 3 |
| S6. Non-metric multidimensional scaling analysis .....    | 4 |
| S7. Canonical correspondence analysis model results ..... | 6 |
| References .....                                          | 7 |

## **S1. Volatile fatty acid analysis**

The different VFA concentrations (C2-C8) were measured through gas chromatography (GC-2014, Shimadzu®, The Netherlands) with a DB-FFAP 123-3232 column (30 m × 0.32 mm × 0.25 µm; Agilent, Belgium) and a flame ionization detector. Sulphuric acid and sodium chloride were used to condition the digestate samples (2 mL), and 2-methyl hexanoic acid was used as internal standard for diethyl ether extraction efficiency quantification. The extracts (1 µL) were injected at 200 °C with a split ratio of 60 and a purge flow of 3 mL min<sup>-1</sup>. The oven temperature was increased by 6 °C min<sup>-1</sup> from 110 °C to 165 °C, where it was maintained for 2 min. The flame ionization detector had a temperature of 220 °C. Nitrogen gas was used as carrier gas at a flow rate of 2.49 mL min<sup>-1</sup>. The detection limit was 30 mg L<sup>-1</sup> for acetate, 10 mg L<sup>-1</sup> for propionate and 2 mg L<sup>-1</sup> for the other VFA (C4-C8).

## S2. Operational data

**Table S1** Overview of the operational parameters of the different full-scale anaerobic digestion plants. Samples with the same name and a different number originate from the same anaerobic digestion plant at a different time point. The operational parameters were measured at the same time point the samples were taken. OLR = organic loading rate, SRT = sludge retention time, TS = total solids, VS = volatile solids, VFA = volatile fatty acids, TAN = total ammonia, FA = free ammonia, CSTR = continuously stirred tank reactor, UASB = upflow anaerobic sludge blanket, OBW = organic biological waste, OFMSW = organic fraction municipal solid waste, MSW = municipal solid waste, n.a. = data not available.

| Name | Type | Capacity       | Feedstock            | OLR                                   | SRT | Temperature | TS                | VS                | pH   | Conductivity        | Total VFA            | TAN               | FA                 | Biogas                                         |
|------|------|----------------|----------------------|---------------------------------------|-----|-------------|-------------------|-------------------|------|---------------------|----------------------|-------------------|--------------------|------------------------------------------------|
|      |      | m <sup>3</sup> |                      | kgCOD m <sup>-3</sup> d <sup>-1</sup> | d   | °C          | g L <sup>-1</sup> | g L <sup>-1</sup> | [-]  | mS cm <sup>-1</sup> | gCOD L <sup>-1</sup> | g L <sup>-1</sup> | mg L <sup>-1</sup> | m <sup>3</sup> m <sup>-3</sup> d <sup>-1</sup> |
| GFTa | CSTR | 3150           | OFMSW                | 13.8                                  | 22  | 50          | 154               | 131               | 8.5  | n.a.                | 0.1                  | 1.7               | 816                | 6.25                                           |
| GFTb | CSTR | 3150           | OFMSW                | 8.8                                   | 25  | 52          | 109               | 87                | 8.3  | n.a.                | 3.3                  | 1.5               | 579                | 3.25                                           |
| GFTc | CSTR | 3450           | OFMSW                | 6.0                                   | 38  | 50          | 309               | 146               | 8.2  | n.a.                | 0.0                  | 2.7               | 870                | 3.25                                           |
| AGRa | CSTR | 1200           | Maize, manure        | 13.8                                  | 124 | 55          | 319               | 138               | n.a. | n.a.                | 2.4                  | 1.4               | n.a.               | 11                                             |
| AGRb | CSTR | 1200           | Maize, manure        | 13.8                                  | 33  | 55          | 389               | 171               | n.a. | n.a.                | 0.0                  | 1.4               | n.a.               | 11                                             |
| AGRc | CSTR | 1200           | Maize, manure        | 13.8                                  | 23  | 55          | 418               | 119               | n.a. | n.a.                | n.a.                 | 1.4               | n.a.               | 11                                             |
| AGRd | CSTR | 1200           | Maize, manure        | 6.3                                   | 23  | 42          | 349               | 154               | n.a. | n.a.                | 5.7                  | 2.1               | n.a.               | 2.5                                            |
| DRZ1 | CSTR | 1000           | Slaughterhouse waste | 11.0                                  | 20  | 54          | 24                | 17                | 8.0  | 30.5                | 11.1                 | 2.4               | 696                | 7.5                                            |
| DRZ2 | CSTR | 1000           | Slaughterhouse waste | 11.0                                  | 20  | 54          | 51                | 35                | 8.0  | 25.0                | 11.1                 | 2.4               | 696                | 7.5                                            |
| SEH1 | CSTR | 1200           | Maize, manure        | 4.0                                   | 40  | 34          | 58                | 33                | 8.0  | 40.1                | 4.7                  | 3.5               | 338                | 1.1                                            |
| SEH2 | CSTR | 1200           | Maize, manure        | 4.0                                   | 40  | 34          | 59                | 34                | 8.1  | 39.5                | 4.5                  | 3.5               | 380                | 1.1                                            |

|      |      |      |                                                 |      |      |    |     |    |     |      |      |     |      |      |
|------|------|------|-------------------------------------------------|------|------|----|-----|----|-----|------|------|-----|------|------|
| BBy1 | CSTR | 3600 | Manure, OBW, energy crops, slaughterhouse waste | 4.5  | 40   | 54 | 42  | 28 | 7.5 | 32.3 | 6.6  | 3.3 | 364  | 1.5  |
| BBy2 | CSTR | 3600 | Manure, OBW, energy crops, slaughterhouse waste | 5.6  | 40   | 54 | 45  | 29 | 7.5 | 32.5 | 7.6  | 3.2 | 353  | 2    |
| BIE1 | CSTR | 2000 | Maize, manure                                   | 4.0  | 30   | 54 | 109 | 67 | 7.9 | 38.5 | 8.1  | 3.1 | 743  | 7.4  |
| BIE2 | CSTR | 2000 | Maize, manure                                   | 4.0  | 30   | 54 | 109 | 68 | 7.9 | 38.2 | 7.9  | 3.3 | 701  | 7.4  |
| BCI1 | CSTR | 1500 | OBW                                             | 3.0  | 80   | 34 | 77  | 16 | 8.0 | 31.7 | 5.6  | 4.0 | 402  | 2.8  |
| BCI2 | CSTR | 1500 | OBW                                             | 3.0  | 80   | 34 | 44  | 24 | 8.0 | 31.7 | 22.6 | 2.7 | 268  | 2.8  |
| BCI3 | CSTR | 1500 | OBW                                             | 3.0  | 80   | 34 | 37  | 23 | 8.0 | 31.7 | 0.8  | 4.2 | 417  | 2.8  |
| Oss1 | CSTR | 4000 | Wastewater sludge                               | 3.0  | 18   | 34 | 44  | 21 | 7.4 | 7.6  | 0.0  | 1.1 | 25   | 2    |
| Oss2 | CSTR | 4000 | Wastewater sludge                               | 3.0  | 18   | 34 | 46  | 24 | 7.5 | 7.3  | 0.0  | 1.0 | 30   | 2    |
| Oss3 | CSTR | 4000 | Wastewater sludge                               | 3.0  | 18   | 34 | 43  | 23 | 7.4 | 6.4  | 0.0  | 1.0 | 26   | 2    |
| EcP  | CSTR | n.a. | n.a.                                            | n.a. | n.a. | 34 | 21  | 13 | 8.3 | 39.2 | 0.0  | 3.1 | 540  | n.a. |
| BAT  | CSTR | n.a. | Manure, OBW                                     | n.a. | n.a. | 34 | 95  | 55 | 8.4 | 61.9 | 1.1  | 4.6 | 890  | n.a. |
| VPK  | UASB | 1210 | Paper mill wastewater                           | 5.6  | n.a. | 35 | 165 | 85 | 7.2 | 6.9  | 0.3  | 0.2 | 4    | 1.2  |
| Clar | UASB | n.a. | Potato wastewater                               | n.a. | n.a. | 34 | 54  | 43 | 7.1 | 8.7  | 0.0  | 0.1 | 2    | n.a. |
| VCE1 | CSTR | 1500 | Maize, manure                                   | 1.5  | 100  | 38 | 127 | 77 | 8.5 | 28.6 | 5.7  | 4.6 | 1460 | 5.6  |
| Myd  | UASB |      | Potato wastewater                               | n.a. | n.a. | 34 | 30  | 20 | 7.1 | 8.0  | 0.3  | 0.8 | 12   | n.a. |
| Agri | CSTR | 1000 | Maize, fats, fruit waste                        | n.a. | 40   | 34 | 133 | 48 | 8.2 | 37.5 | 0.9  | 2.9 | 410  | 5.7  |
| Den  | CSTR | 3255 | Sludge, manure                                  | 3.0  | 20   | 33 | 36  | 18 | 7.4 | 7.7  | 0.0  | 0.5 | 11   | 2.7  |
| SHA  | CSTR | 1500 | OBW                                             | 2.5  | 60   | 34 | 124 | 79 | 8.1 | 31.5 | 0.2  | 3.9 | 459  | 6.4  |
| BIF  | CSTR | 1250 | Manure                                          | 2.5  | 60   | 34 | 103 | 68 | 8.1 | 42.1 | 0.7  | 5.0 | 530  | 4.1  |
| CAZ  | CSTR | 3000 | Maize, manure                                   | 5.0  | 40   | 34 | 74  | 50 | 7.8 | 25.3 | 36.8 | 5.0 | 287  | 5.7  |
| SMA  | CSTR | 3200 | Maize, manure                                   | 4.0  | 40   | 34 | 112 | 64 | 8.3 | 62.3 | 0.4  | 6.4 | 1020 | 2.1  |

### S3. Rarefaction curves

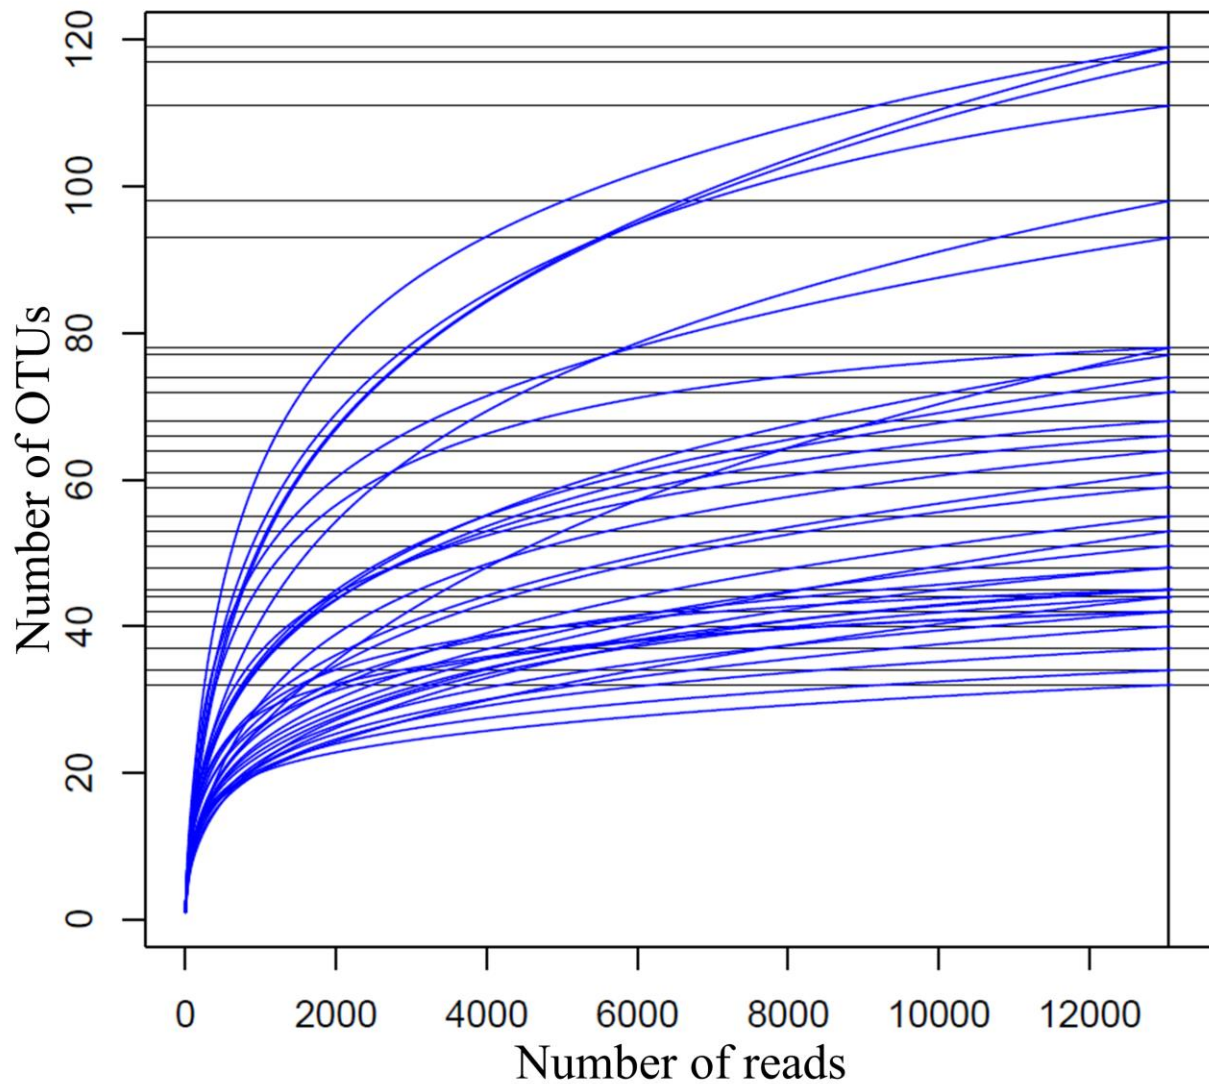

**Figure S1** Rarefaction curves indicating the number of resolved OTUs against sampling depth of the different samples based on 16S rRNA gene amplicon sequencing (Illumina HiSeq platform). Data were normalised via the common-scale method [\[1\]](#), and only OTUs with a relative abundance  $\geq 1\%$  in at least one sample were included.

## S4. Microbial community diversity

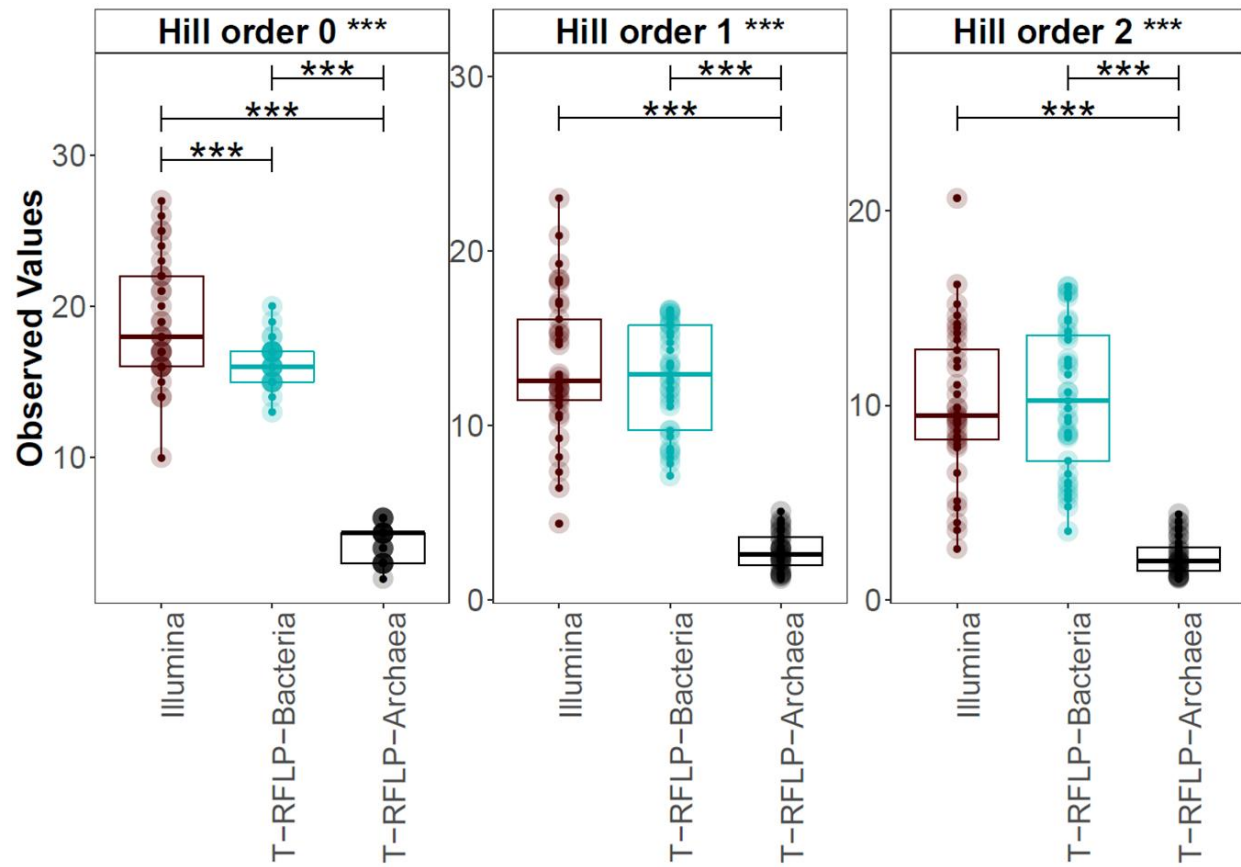

**Figure S2** Hill's numbers of the Illumina, bacterial T-RFLP and archaeal T-RFLP data. The richness ( $H_0$ ), exponential of the Shannon diversity index ( $H_1$ ) and the Inverse Simpson index ( $H_2$ ) are included. \*\*\* =  $P < 0.001$ .

## S5. Microbial community organisation

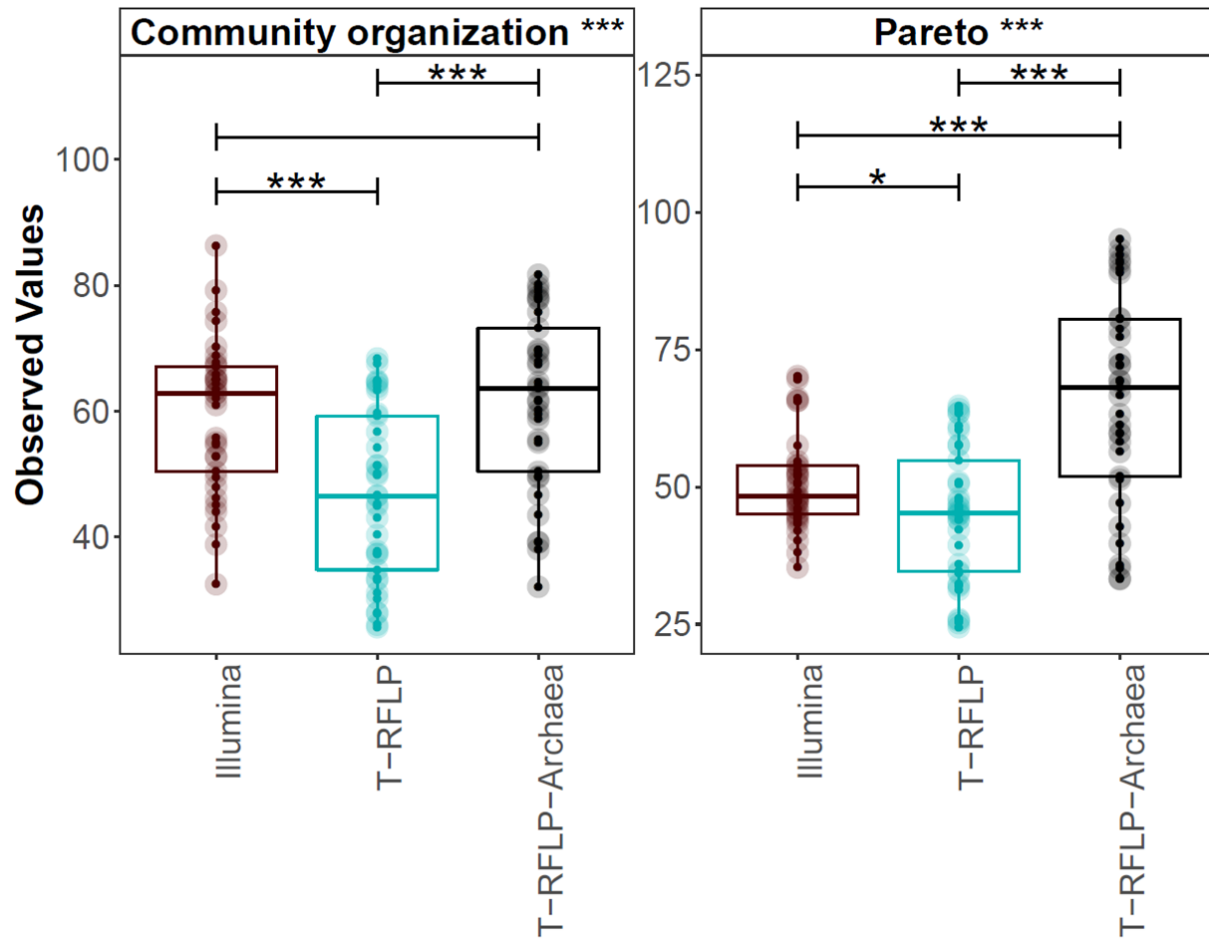

**Figure S3** Community organisation (Co) and Pareto profile of the Illumina, bacterial T-RFLP and archaeal T-RFLP data. The Co was calculated based on the Lorenz distribution curves <sup>2,3</sup>, and the Pareto value was calculated as the total relative abundance of the 20% most abundant OTUs or TRFs <sup>4,5</sup>. \*= $P < 0.05$  & \*\*\* =  $P < 0.001$ .



## S6. Non-metric multidimensional scaling analysis

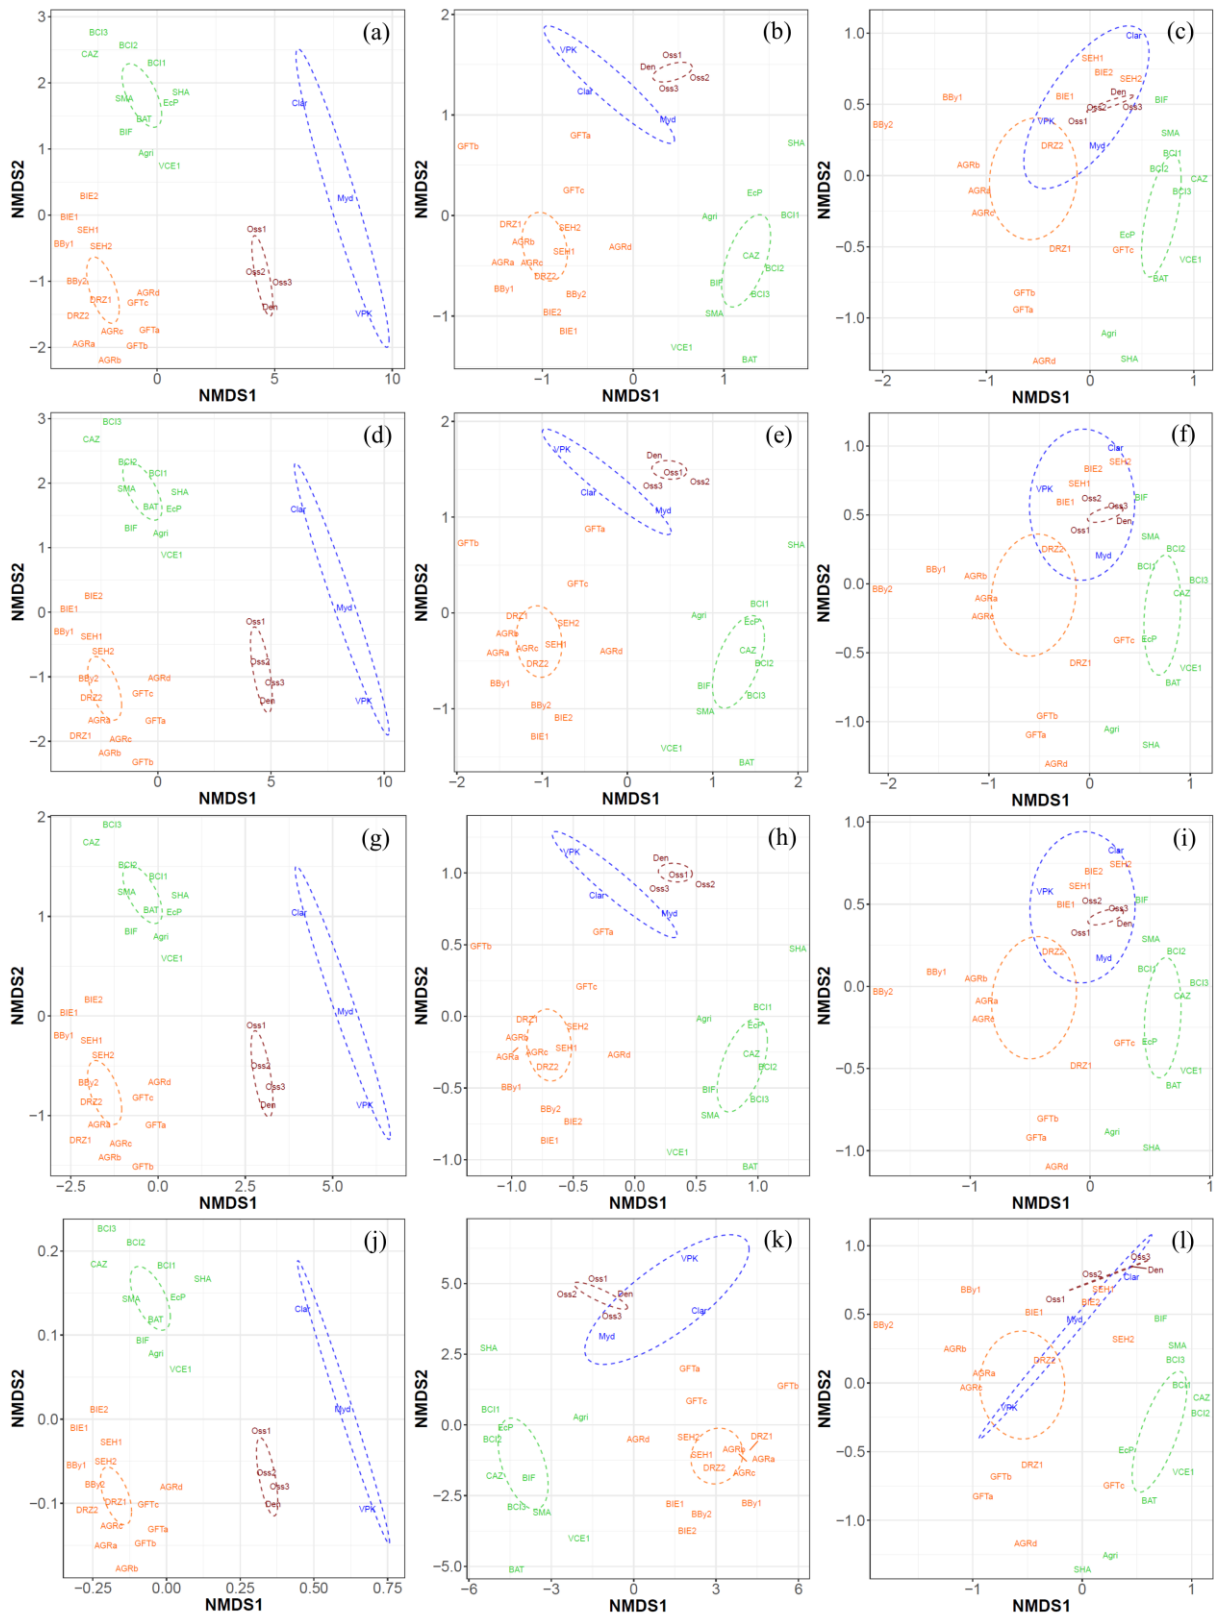

**Figure S4** Non-metric multidimensional scaling (NMDS) analysis of the Chao (a-c), Jaccard (d-f), Kulczynski (g-i) and Mountford (j-l) distance measures for the Illumina (a, d, g and j), bacterial T-RFLP (b, e, h and k) and archaeal T-RFLP (c, f, i and l) data at OTU/TRF level. The four different clusters Cluster 1 (red), Cluster 2 (blue), Cluster 3 (green), and Cluster 4 (orange) are distinguished, and the ellipses represent the 95% value of the standard error of the average value for each cluster.

## S7. Canonical correspondence analysis model results

**Table S2** Overview of the results of the canonical correspondence model analysis (carried out with the *envfit* function, vegan package) by means of which the relation of the pH, temperature and total ammonia nitrogen (TAN) with the Illumina, bacterial TRFLP and archaeal TRFLP data was determined. Both the P-values (PERMANOVA) and R<sup>2</sup> (CCA model) values are shown.

| P-values              | Illumina | Bacterial TRFLP | Archaeal TRFLP |
|-----------------------|----------|-----------------|----------------|
| pH                    | 0.0001   | 0.001           | 0.002          |
| Temperature           | 0.0001   | 0.001           | 0.002          |
| TAN                   | 0.064    | 0.007           | 0.108          |
| R <sup>2</sup> values |          |                 |                |
| pH                    | 0.876    | 0.783           | 0.467          |
| Temperature           | 0.858    | 0.776           | 0.518          |
| TAN                   | 0.830    | 0.898           | 0.459          |

## References

- 1 McMurdie, P. J. & Holmes, S. Waste Not, Want Not: Why Rarefying Microbiome Data Is Inadmissible. *PLoS Comput. Biol.* **10**, 12, doi:10.1371/journal.pcbi.1003531 (2014).
- 2 Marzorati, M., Wittebolle, L., Boon, N., Daffonchio, D. & Verstraete, W. How to get more out of molecular fingerprints: practical tools for microbial ecology. *Environ. Microbiol.* **10**, 1571-1581, doi:10.1111/j.1462-2920.2008.01572.x (2008).
- 3 Lorenz, M. O. Methods of Measuring the Concentration of Wealth. *Publications of the American Statistical Association* **9**, 209-219, doi:10.2307/2276207 (1905).
- 4 Dejonghe, W., Boon, N., Seghers, D., Top, E. M. & Verstraete, W. Bioaugmentation of soils by increasing microbial richness: missing links. *Environ. Microbiol.* **3**, 649-657, doi:10.1046/j.1462-2920.2001.00236.x (2001).
- 5 Pareto, V. *Le Cours d'Economie Politique*. (Droz, 1897).
